# Supplementary material
Source: PubMed Central journal article supplement (PMC10564351)

# Supplemental Material Table of contents

**Supplemental Table 1** The median interval (months) from starting denosumab therapy to each measurement.

**Supplemental Table 2** Baseline clinical and biochemical characteristics of 4 dialysis patients who developed hip fracture during studied period.

**Supplemental Table 3** Linear mixed model of CKD-MBD parameters from baseline to a maximum of 5 years of denosumab therapy.

**Supplemental Table 4** Linear mixed model of medication doses from baseline to a maximum of 5 years of denosumab therapy.

**Supplemental Table 5** Linear mixed model of 3D DXA parameters from baseline to a maximum of 5 years of denosumab therapy.

**Supplemental Table 6** Linear mixed model of bone strength indices at the neck region from baseline to a maximum of 5 years of denosumab therapy.

**Supplemental Table 7** Predictors of changes in areal BMD, trabecular volumetric BMD and cortical surface BMD from multivariable mixed analysis.

**Supplemental Figure 1** Patient disposition

**Supplemental Figure 2** Patient disposition for discontinuation analysis

**Supplemental Figure 3** Time courses of the CKD-MBD parameters from baseline to a maximum of 5 years of denosumab therapy.

**Supplemental Figure 4** Stacked bar chart of medication dose from baseline to a maximum of 5 years of denosumab therapy.

**Supplemental Figure 5** Changes at the total hip region in areal BMD (a), integral volumetric BMD (b), trabecular volumetric BMD (c), cortical volumetric BMD (d), cortical thickness (e), and cortical surface BMD (f) after denosumab discontinuation in 11 dialysis patients.

**Supplemental Figure 6** Changes at the neck region in cross-sectional area (a), cross-sectional moment of inertia (b), section modulus (c), and buckling ratio (d) after denosumab discontinuation in 11 dialysis patients.

**Supplemental Figure 7** Cross-sectional images showing the time course of the average changes in volumetric BMD from 1 year before to 4 years after denosumab initiation in 39 dialysis patients.

**Supplemental Figure 8** Cross-sectional images showing the time course of the average changes in volumetric BMD after denosumab discontinuation in 11 dialysis patients.

**Supplemental Table 1.** The median interval (months) from starting denosumab therapy to each measurement.

| <b>Time points (Y)</b> | <b>N</b> | <b>Median interval, month (IQR)</b> |
|------------------------|----------|-------------------------------------|
| <b>-1</b>              | 103      | -12.9 (-13.8 - -12.4)               |
| <b>-0.5</b>            | 95       | -6.9 (-7.6 - -6.3)                  |
| <b>Baseline</b>        | 124      | -0.7 (-1.5 - -0.3)                  |
| <b>0.5</b>             | 117      | 5.4 (4.6 - 6.1)                     |
| <b>1</b>               | 114      | 11.4 (10.4 - 12.0)                  |
| <b>1.5</b>             | 107      | 17.5 (16.7 - 18.1)                  |
| <b>2</b>               | 99       | 23.5 (22.7 - 24.2)                  |
| <b>2.5</b>             | 84       | 29.7 (28.9 - 30.5)                  |
| <b>3</b>               | 67       | 35.9 (34.9 - 36.7)                  |
| <b>3.5</b>             | 58       | 42.0 (41.4 - 42.7)                  |
| <b>4</b>               | 48       | 48.1 (47.3 - 49.4)                  |
| <b>4.5</b>             | 45       | 54.3 (53.6 - 55.0)                  |
| <b>5</b>               | 27       | 60.3 (59.4 - 60.9)                  |

Abbreviations: Y, year; IQR, range from 25th to 75th percentile; M, month.

**Supplemental Table 2** Baseline clinical and biochemical characteristics of 4 dialysis patients who developed hip fracture during studied period.

| <i>Patients number</i>                                        | 1    | 2    | 3    | 4      |
|---------------------------------------------------------------|------|------|------|--------|
| Age (years)                                                   | 66   | 73   | 70   | 63     |
| Sex                                                           | Male | Male | Male | Female |
| Hemodialysis therapy                                          | HD   | HD   | HD   | HD     |
| Dialysis vintage, (months)                                    | 79   | 233  | 103  | 137    |
| Cause of Kidney Failure                                       | BNS  | CGN  | BNS  | BNS    |
| Smoker                                                        | No   | No   | Yes  | No     |
| Diabetes mellitus                                             | Yes  | No   | Yes  | Yes    |
| <b><i>Bone mineral density (BMD)</i></b>                      |      |      |      |        |
| Total hip BMD, (g/cm <sup>2</sup> )                           | 0.84 | 0.76 | 0.78 | 0.59   |
| Femoral neck BMD, (g/cm <sup>2</sup> )                        | 0.51 | 0.53 | 0.53 | 0.45   |
| T-score, (SD)                                                 | -2.8 | -2.6 | -2.6 | -3.1   |
| Z-score, (SD)                                                 | -1.9 | -1.3 | -1.8 | -1.4   |
| <b><i>Circulating biomarkers</i></b> (n=121)                  |      |      |      |        |
| Albumin, (g/dL)                                               | 3.4  | 3.4  | 3.3  | 3.1    |
| Calcium, (mg/dL)                                              | 8.5  | 9.6  | 8.8  | 7.8    |
| Phosphate, (mg/dL)                                            | 5.6  | 5.6  | 5.6  | 6.2    |
| i-PTH, (pg/mL)                                                | 221  | 183  | 123  | 333    |
| Alkaline phosphatase, (U/L)                                   | 187  | 214  | 262  | 341    |
| <b><i>3D-DXA parameters and bone strength indices</i></b>     |      |      |      |        |
| Trabecular volumetric BMD at total, (mg/cm <sup>3</sup> )     | 80   | 113  | 100  | 95     |
| Cortical volumetric BMD at total, (mg/cm <sup>3</sup> )       | 750  | 745  | 795  | 644    |
| Cortical Thickness at total, (mm)                             | 1.76 | 1.64 | 1.63 | 1.49   |
| Cortical surface BMD at total, (mg/cm <sup>3</sup> )          | 132  | 122  | 130  | 96     |
| Cross-sectional area at neck, (cm <sup>2</sup> )              | 0.64 | 0.72 | 0.65 | 0.59   |
| Cross-sectional moment of inertia at neck, (cm <sup>4</sup> ) | 1.07 | 1.10 | 1.14 | 0.73   |
| Section modulus at neck, (cm <sup>3</sup> )                   | 0.47 | 0.56 | 0.50 | 0.40   |
| Buckling ratio at neck                                        | 13   | 13   | 15   | 11     |

Abbreviation: HD, hemodialysis; BNS, Benign nephrosclerosis; CGN, Chronic glomerulonephritis; i-PTH, intact-parathyroid hormone.

**Supplemental Table 3** Linear mixed model of CKD-MBD parameters from baseline to a maximum of 5 years of denosumab therapy.

|                                            | Coefficient (95%CI) (for each additional year) | p-value |
|--------------------------------------------|------------------------------------------------|---------|
| <b>Calcium</b> , (mg/dL)                   | 0.20 (-0.01 - 0.05)                            | 0.24    |
| <b>Phosphate</b> , (mg/dL)                 | 0.17 (-0.05 - 0.08)                            | 0.61    |
| <b>i-PTH</b> , (pg/mL)                     | -4.28 (-11.91 - 3.35)                          | 0.28    |
| <b>ALP</b> , (U/L)                         | -4.83 (-9.76 - 0.10)                           | 0.06    |
| <b>Albumin-corrected calcium</b> , (mg/dL) | 0.003 (0.002- 0.005)                           | <0.001  |
| <b>Albumin</b> , (g/dL)                    | 0.49 (0.32- 0.65)                              | <0.001  |

Abbreviation: i-PTH, intact-parathyroid hormone; ALP, alkaline phosphatase.

**Supplemental Table 4** Linear mixed model of medication doses from baseline to a maximum of 5 years of denosumab therapy.

|                                     | <b>Coefficient</b> (95%CI) (for each additional year) | <b>p-value</b> |
|-------------------------------------|-------------------------------------------------------|----------------|
| <b>Calcium carbonate</b> , (mg/day) | -20 (-62 - 23)                                        | 0.37           |
| <b>Cinacalcet</b> , (mg/day)        | -0.5 (-1.5 – 0.6)                                     | 0.39           |
| <b>Alfacidol</b> , (mg/day)         | -0.04 (-0.05 - -0.03)                                 | <0.001         |
| <b>Calcitriol</b> , (mg/day)        | -0.01 (-0.03 - -0.001)                                | <0.05          |

**Supplemental Table 5.** Linear mixed model of 3D DXA parameters from baseline to a maximum of 5 years of denosumab therapy.

|                                                          | Coefficient (95%CI) (for each additional year) | p-value |
|----------------------------------------------------------|------------------------------------------------|---------|
| <b>Areal BMD</b> , (g/cm <sup>2</sup> )                  | 0.04 (0.04- 0.05)                              | <0.001  |
| <b>Integral volumetric BMD</b> , (mg/cm <sup>3</sup> )   | 1.03 (0.60- 1.45)                              | <0.001  |
| <b>Trabecular volumetric BMD</b> , (mg/cm <sup>3</sup> ) | 0.55 (0.27- 0.83)                              | <0.001  |
| <b>Cortical volumetric BMD</b> , (mg/cm <sup>3</sup> )   | 1.58 (1.07- 2.09)                              | <0.001  |
| <b>Cortical Thickness</b> , (mm)                         | 0.003 (0.002- 0.005)                           | <0.001  |
| <b>Cortical surface BMD</b> , (mg/cm <sup>3</sup> )      | 0.49 (0.32- 0.65)                              | <0.001  |

Abbreviations: CI, confidence interval; BMD, bone mineral density.

**Supplemental Table 6.** Linear mixed model of bone strength indices at the neck region from baseline to a maximum of 5 years of denosumab therapy.

|                                          | Coefficient (95%CI)  | p-value |
|------------------------------------------|----------------------|---------|
| <b>Cross-sectional area</b>              | 0.03 (0.02- 0.04)    | <0.001  |
| <b>Cross-sectional moment of inertia</b> | 0.005 (0.001- 0.010) | <0.05   |
| <b>Section modulus</b>                   | 0.002 (0.001- 0.004) | <0.01   |
| <b>Buckling ratio</b>                    | 0.03 (0.01- 0.05)    | <0.001  |

Abbreviations: CI, confidence interval.

**Supplemental Table 7.** Predictors of changes in areal BMD, trabecular volumetric BMD and cortical surface BMD from multivariable mixed analysis.

| Baseline variables                    | Areal BMD            |         | Trabecular volumetric BMD |         | Cortical surface BMD |         |
|---------------------------------------|----------------------|---------|---------------------------|---------|----------------------|---------|
|                                       | Coefficient (95%CI)  | p value | Coefficient (95%CI)       | p value | Coefficient (95%CI)  | p value |
| <b>Calcium</b>                        | -0.51 (-3.04-2.03)   | 0.69    | -2.06 (-11.75-7.63)       | 0.67    | -0.72 (-5.77-4.33)   | 0.78    |
| <b>Phosphate</b>                      | -0.78 (-1.91-0.34)   | 0.17    | -1.46 (-5.81-2.89)        | 0.51    | -1.39 (-3.63-0.86)   | 0.22    |
| <b>i-PTH</b>                          | 0.002 (-0.009-0.014) | 0.69    | 0.03 (-0.02-0.07)         | 0.26    | 0.019 (-0.003-0.043) | 0.09    |
| <b>ALP</b>                            | 0.01 (0.004-0.023)   | <0.01   | 0.01 (-0.03-0.05)         | 0.72    | 0.016 (-0.005-0.036) | 0.13    |
| <b>Alb</b>                            | 2.37 (-1.07-5.82)    | 0.17    | 15.18 (0.83-29.53)        | <0.05   | 5.29 (-2.32-12.90)   | 0.17    |
| <b>Calcium carbonate (yes vs. no)</b> | 0.32 (-2.26-2.91)    | 0.80    | -1.26 (-11.14-8.62)       | 0.80    | 0.40 (-4.74-5.55)    | 0.88    |
| <b><sup>a</sup>VDRA (yes vs. no)</b>  | 0.61 (-1.68-2.90)    | 0.60    | 1.46 (-7.30-10.22)        | 0.74    | 3.37 (-1.11-7.85)    | 0.14    |
| <b>Cinacalcet (yes vs. no)</b>        | 0.35 (-1.87-2.57)    | 0.75    | -4.34 (-12.77-4.09)       | 0.31    | 0.47 (-3.96-4.89)    | 0.83    |

Abbreviation: BMD, bone mineral density; i-PTH, intact-parathyroid hormone; ALP, alkaline phosphatase; VDRA vitamin D receptor activator. <sup>a</sup>VDRA, as sum of alfacalcidol and Calcitriol. Each baseline variables were adjusted for age (years), sex (male vs. female).



**Supplemental Figure 1. Patient disposition**

**Impacts of denosumab therapy on bone**

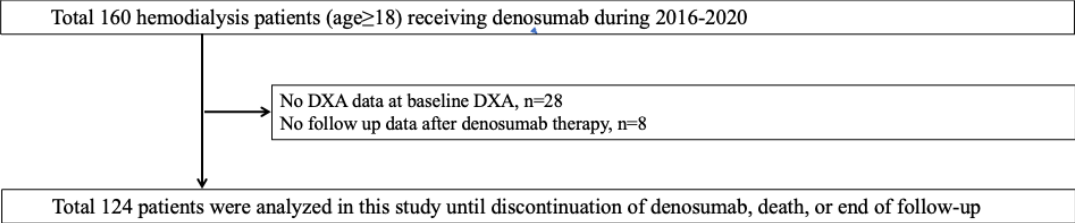

**Supplemental Figure 2. Patient disposition for discontinuation analysis**

**Impacts of discontinuation of denosumab therapy on bone**

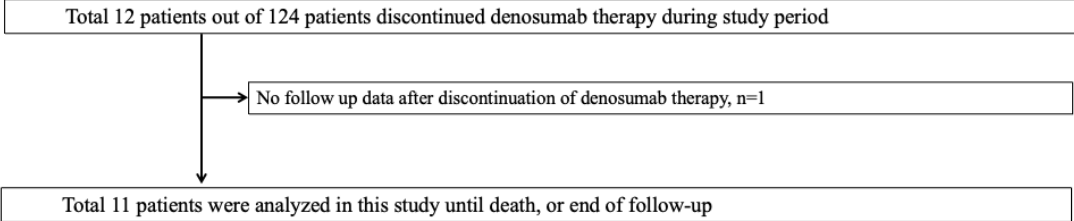

**Supplemental Figure 3.** Time courses of the CKD-MBD parameters from baseline to a maximum of 5 years of denosumab therapy.

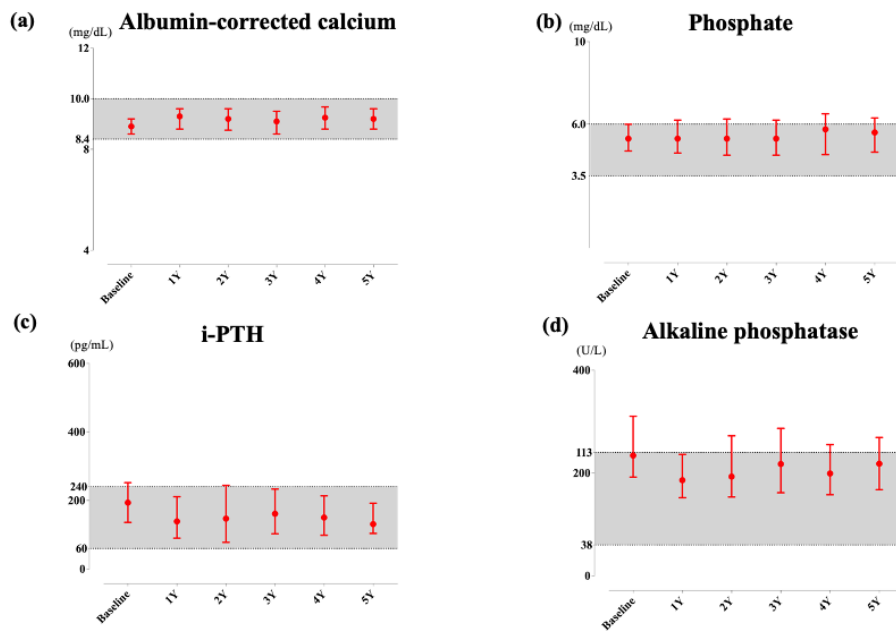

Data represent the median (IQR). The gray shaded area represents the reference value (recommended by JSDT). Abbreviation: i-PTH, intact-parathyroid hormone.

**Supplemental Figure 4.** Stacked bar chart of medication dose from baseline to a maximum of 5 years of denosumab therapy.

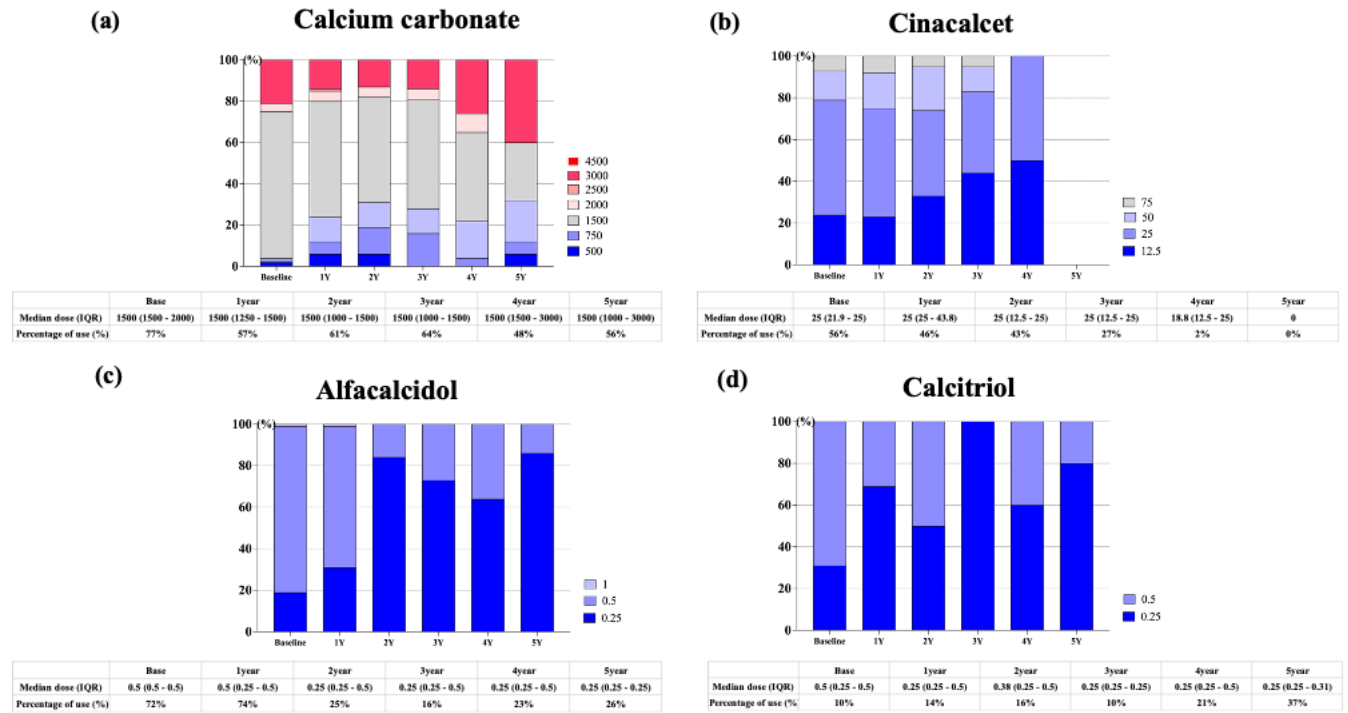

The table in the bottom row shows median doses (IQR) and percentage of medication use (%).

**Supplemental Figure 5.** Changes at the total hip region in areal BMD (a), integral volumetric BMD (b), trabecular volumetric BMD (c), cortical volumetric BMD (d), cortical thickness (e), and cortical surface BMD (f) after denosumab discontinuation in 11 dialysis patients. Data represent the median (IQR). Abbreviations: Y, year; BMD, bone mineral density; DXA, dual-energy X-ray absorptiometry; IQR, interquartile range. # $p < 0.05$  vs baseline (by Wilcoxon's signed-rank test).

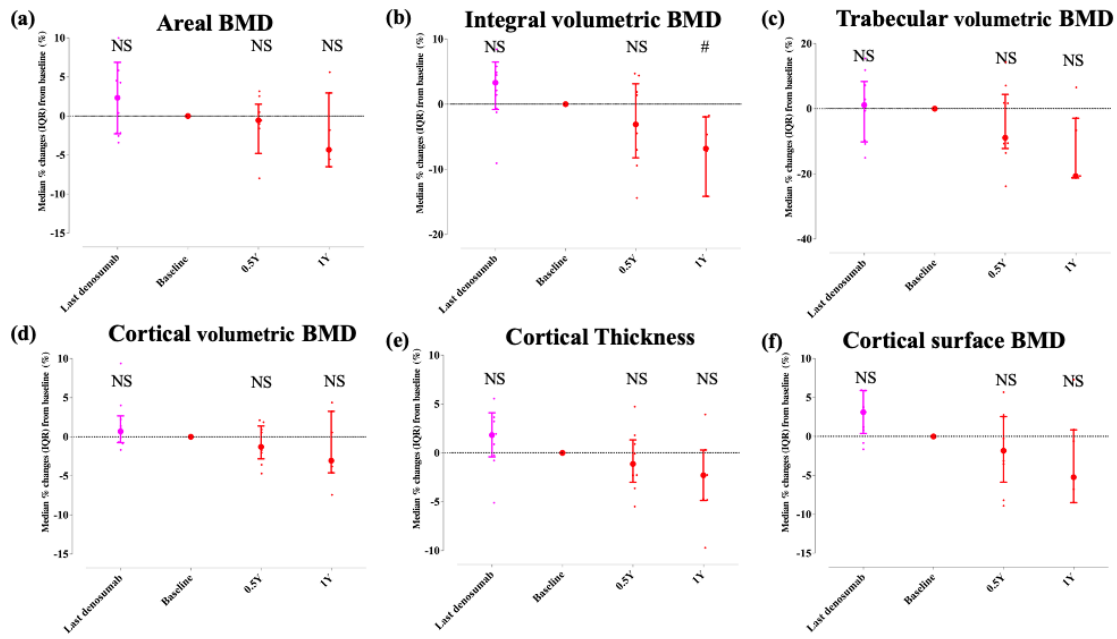

**Supplemental Figure 6.** Changes at the neck region in cross-sectional area (a), cross-sectional moment of inertia (b), section modulus (c), and buckling ratio (d) after denosumab discontinuation in 11 dialysis patients.

Data represent the median (IQR). Abbreviations: Y, year; IQR, interquartile range.

NS vs baseline (by Wilcoxon's signed-rank test).

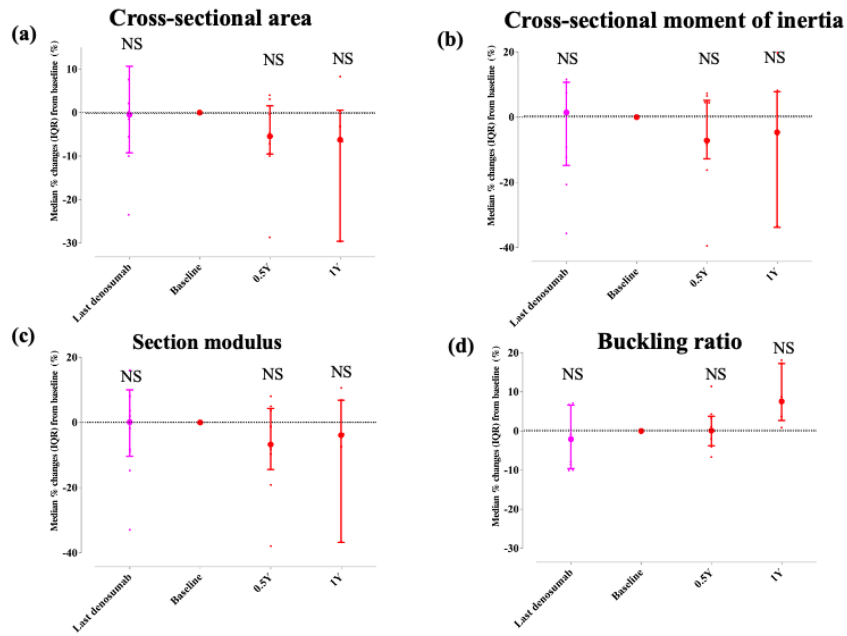

**Supplemental Figure 7.** Cross-sectional images showing the time course of the average changes in volumetric BMD from 1 year before to 4 years after denosumab initiation in 39 dialysis patients.

Data reflect the absolute volumetric BMD changes from baseline, with blue/green representing higher volumetric BMD, yellow/orange representing lower volumetric BMD, and black representing no change. Abbreviations: volumetric BMD, volumetric BMD.

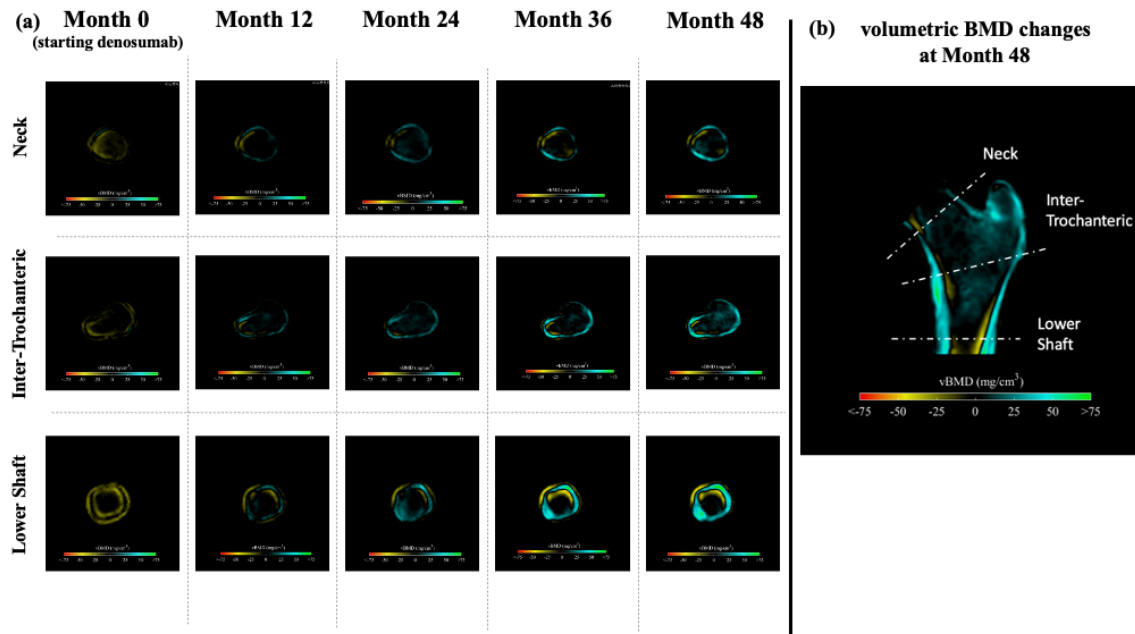

**Supplemental Figure 8.** Cross-sectional images showing the time course of the average changes in volumetric BMD after denosumab discontinuation in 11 dialysis patients. Data reflect absolute volumetric BMD changes from baseline, with blue/green representing higher volumetric BMD, yellow/orange representing lower volumetric BMD, and black representing no change. Abbreviations: volumetric BMD, volumetric BMD.

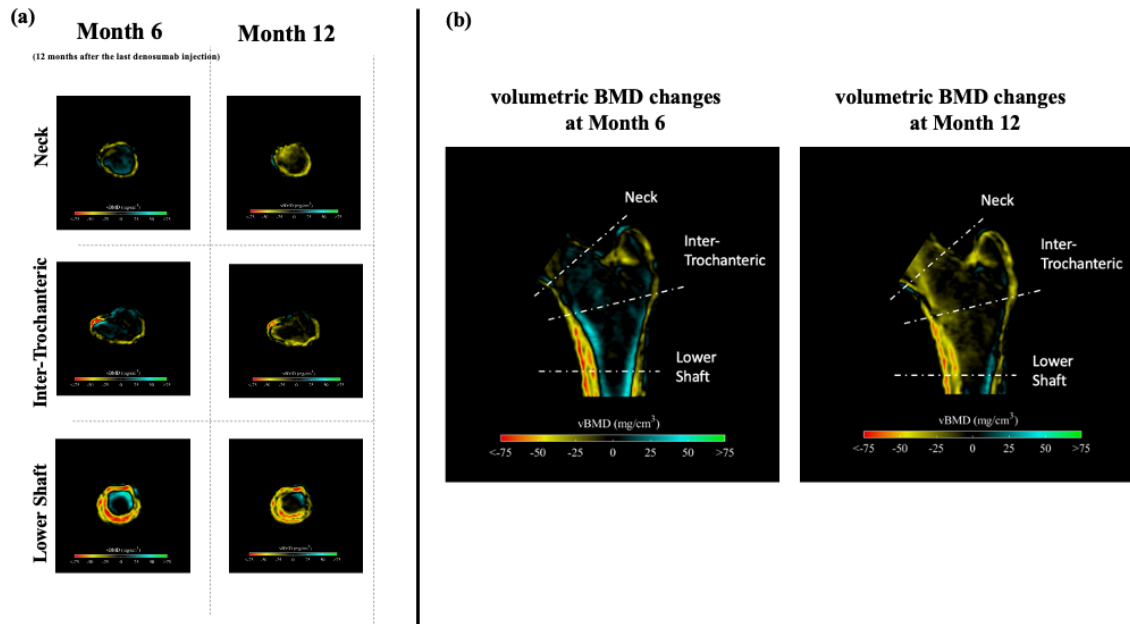

Supplement: cjasn-18-1195-s001.pdf [file cjasn-18-1195-s001.pdf]
